# Supplementary material for: Polyaromatic Bis(indolyl)methane Derivatives with Antiproliferative and Antiparasitic Activity
Source: MDPI journal article supplement (doi:10.3390/molecules28237728), 2023-11-23
Supplement: s1 [file s1]

# Supporting Information

## Polyaromatic *bis*(indolyl)methane derivatives with antiproliferative and antiparasitic activity

Raquel C. R. Gonçalves<sup>1,2</sup>, Pablo Peñalver<sup>3</sup>, Susana P. G. Costa<sup>1</sup>, Juan C. Morales<sup>3</sup> and Maria Manuela M. Raposo<sup>1\*</sup>

<sup>1</sup>Centre of Chemistry, University of Minho, Campus of Gualtar, 4710-057 Braga, Portugal.

<sup>2</sup>Advanced (Magnetic) Theranostic Nanostructures Lab, International Iberian Nanotechnology Laboratory, Av. Mestre José Veiga s/n, 4715-330 Braga, Portugal.

<sup>3</sup>Instituto de Parasitología y Biomedicina López Neyra, CSIC, PTS Granada, Avenida del Conocimiento, 17, 18016, Armilla, Granada, Spain.

\*Correspondence: mfox@quimica.uminho.pt

|                                                                                                                           |   |
|---------------------------------------------------------------------------------------------------------------------------|---|
| <b>Figure S1.</b> <sup>1</sup> H NMR spectra of BIM <b>2a</b> in DMSO- <i>d</i> <sub>6</sub> .....                        | 2 |
| <b>Figure S2.</b> <sup>13</sup> C NMR spectra of BIM <b>2a</b> in DMSO- <i>d</i> <sub>6</sub> .....                       | 3 |
| <b>Figure S3.</b> <sup>1</sup> H NMR spectra of BIM <b>2b</b> in DMSO- <i>d</i> <sub>6</sub> .....                        | 4 |
| <b>Figure S4.</b> <sup>13</sup> C NMR spectra of BIM <b>2b</b> in DMSO- <i>d</i> <sub>6</sub> .....                       | 5 |
| <b>Figure S5.</b> <sup>1</sup> H NMR spectra of BIM <b>2c</b> in DMSO- <i>d</i> <sub>6</sub> .....                        | 6 |
| <b>Figure S6.</b> Normalized UV-visible absorption and emission spectra of BIM <b>2a</b> in ACN solution.....             | 7 |
| <b>Figure S7.</b> Dose-response curve of BIM <b>2a-c</b> in <i>T. brucei</i> parasites.....                               | 7 |
| <b>Figure S8.</b> Dose-response curve of BIM <b>2a-c</b> in <i>L. major</i> parasites.....                                | 8 |
| <b>Figure S9.</b> Dose-response curve of BIM <b>2a-c</b> in HeLa cells.....                                               | 8 |
| <b>Figure S10.</b> Dose-response curve of BIM <b>2a-c</b> in HT-29 cells.....                                             | 9 |
| <b>Figure S11.</b> Cell viability of <i>T. brucei</i> , <i>L. major</i> , HeLa, and HT-29 cells treated with DMSO 1%..... | 9 |

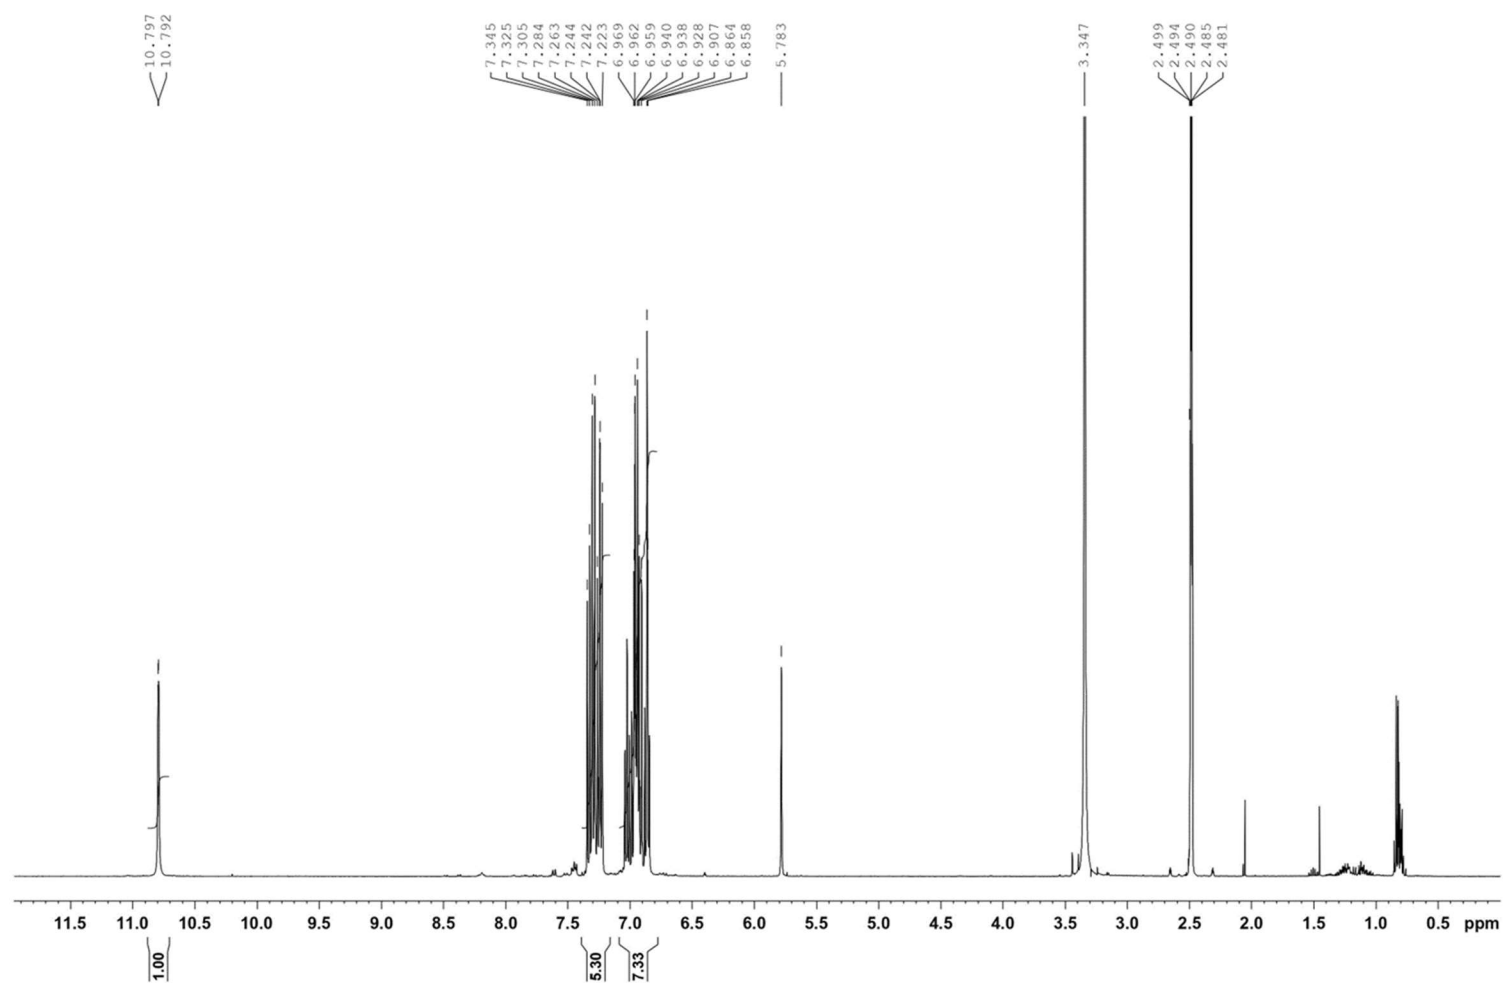

**Figure S1.** <sup>1</sup>H NMR spectra of BIM 2a in DMSO-*d*<sub>6</sub>.

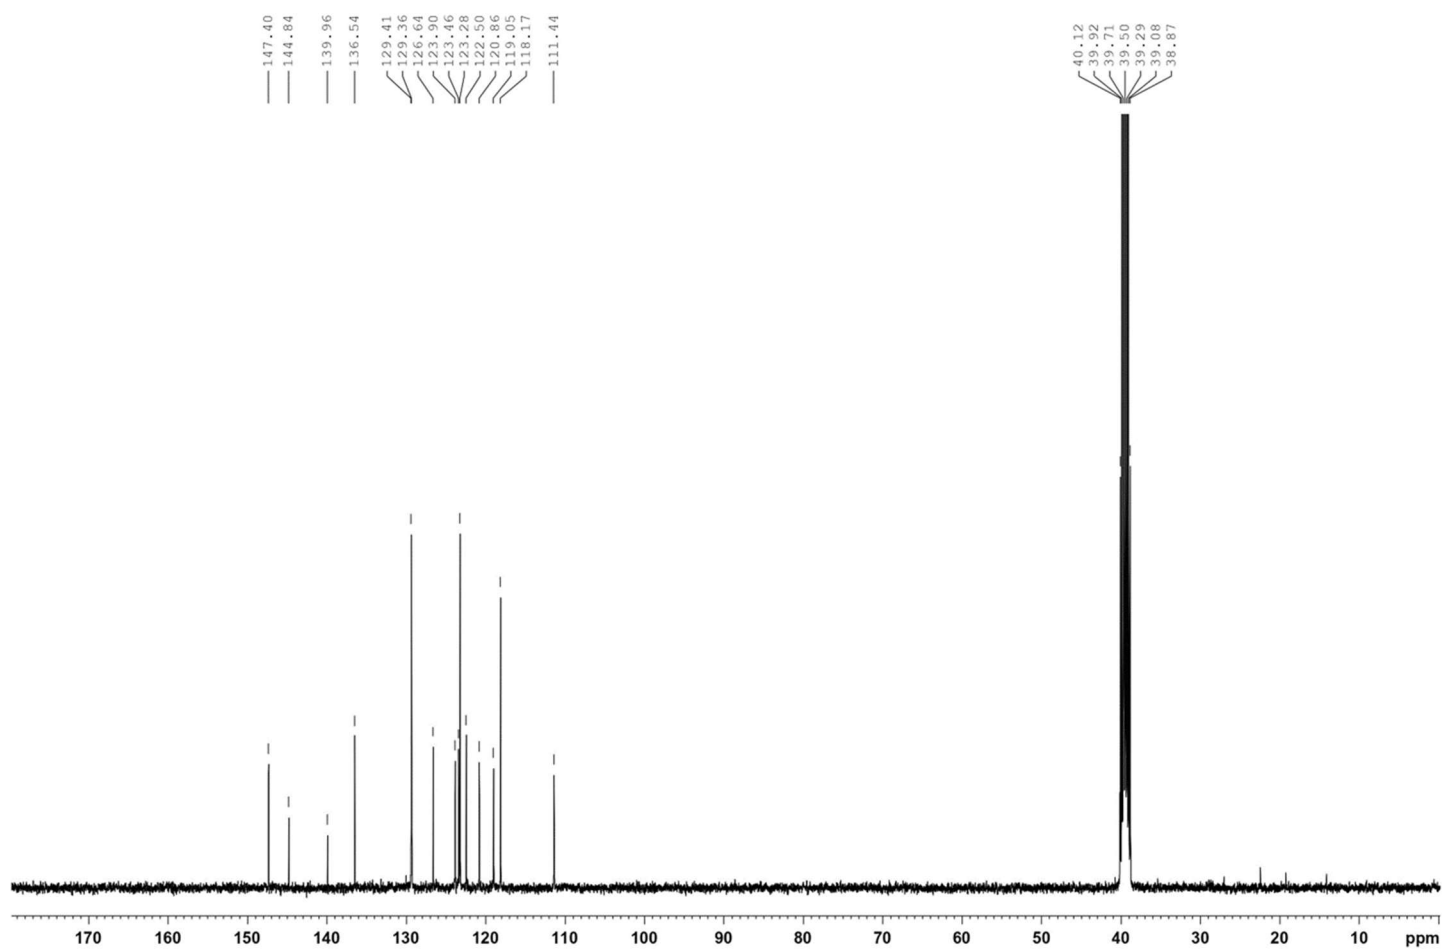

**Figure S2.**  $^{13}\text{C}$  NMR spectra of BIM 2a in  $\text{DMSO-}d_6$ .

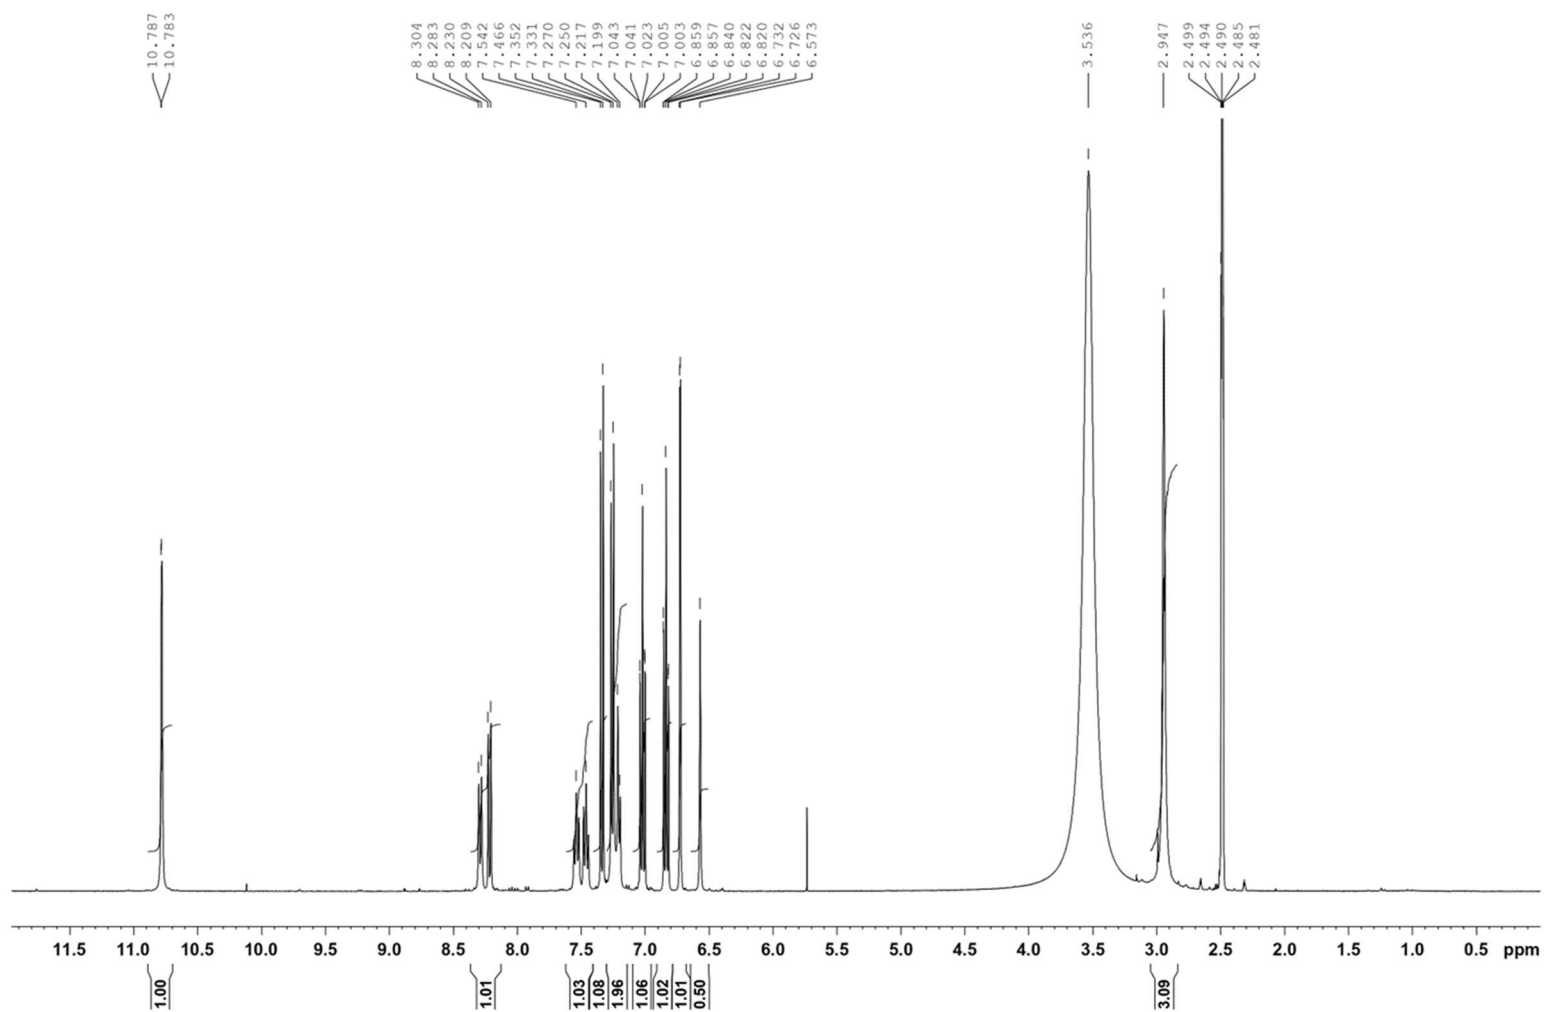

**Figure S3.** <sup>1</sup>H NMR spectra of BIM **2b** in DMSO-*d*<sub>6</sub>.

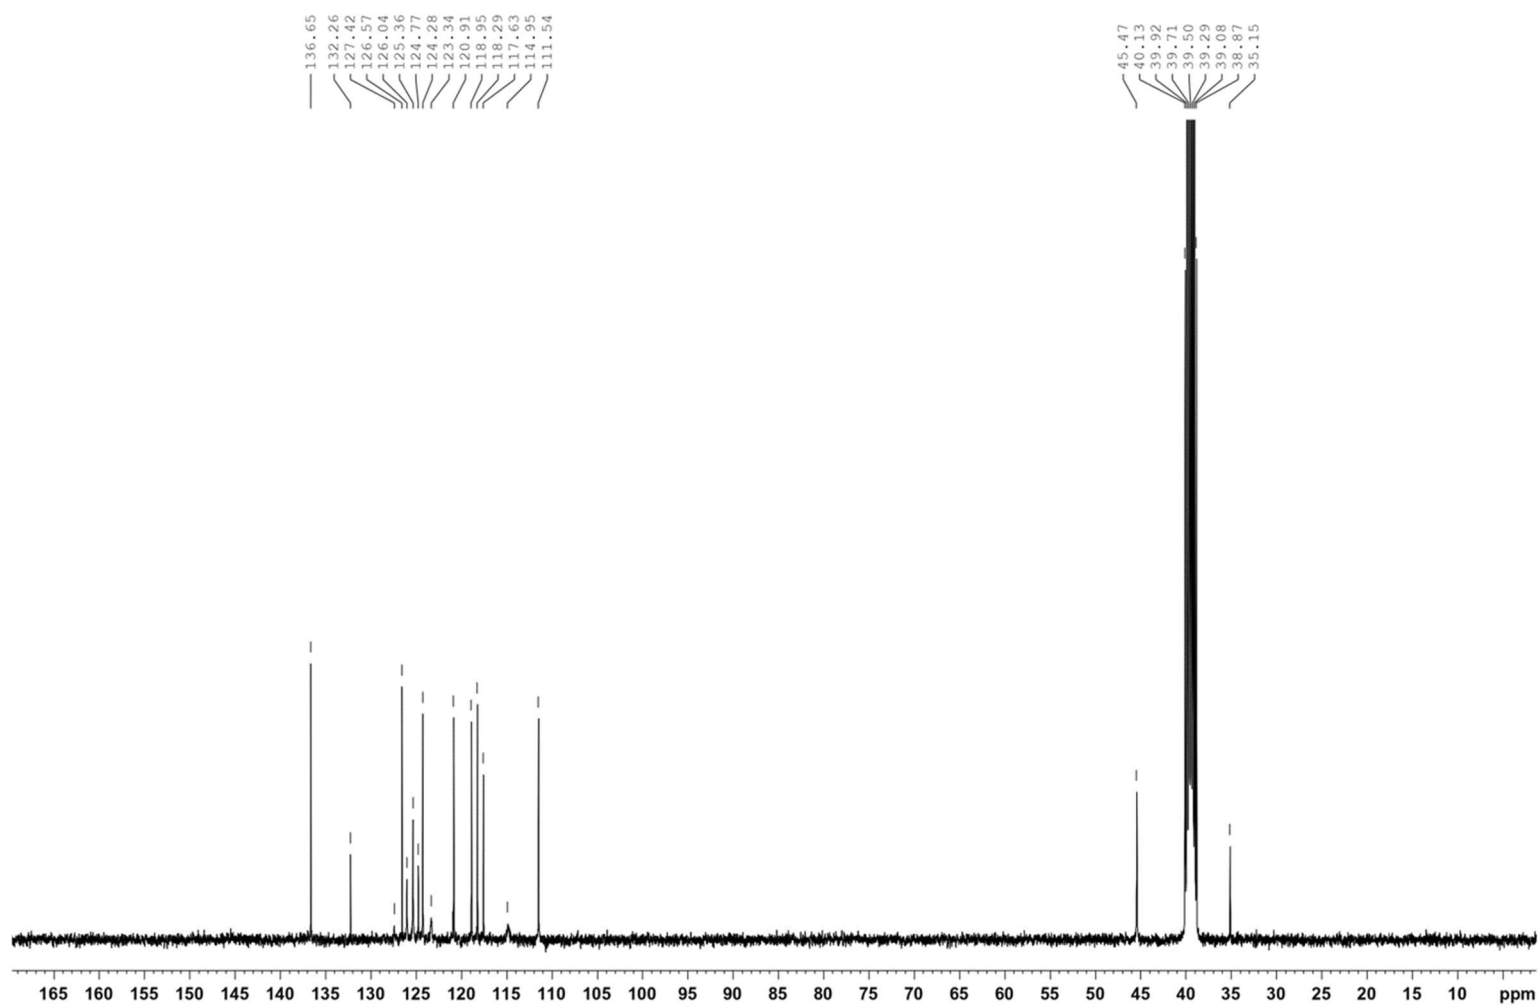

**Figure S4.**  $^{13}\text{C}$  NMR spectra of BIM **2b** in  $\text{DMSO}-d_6$ .

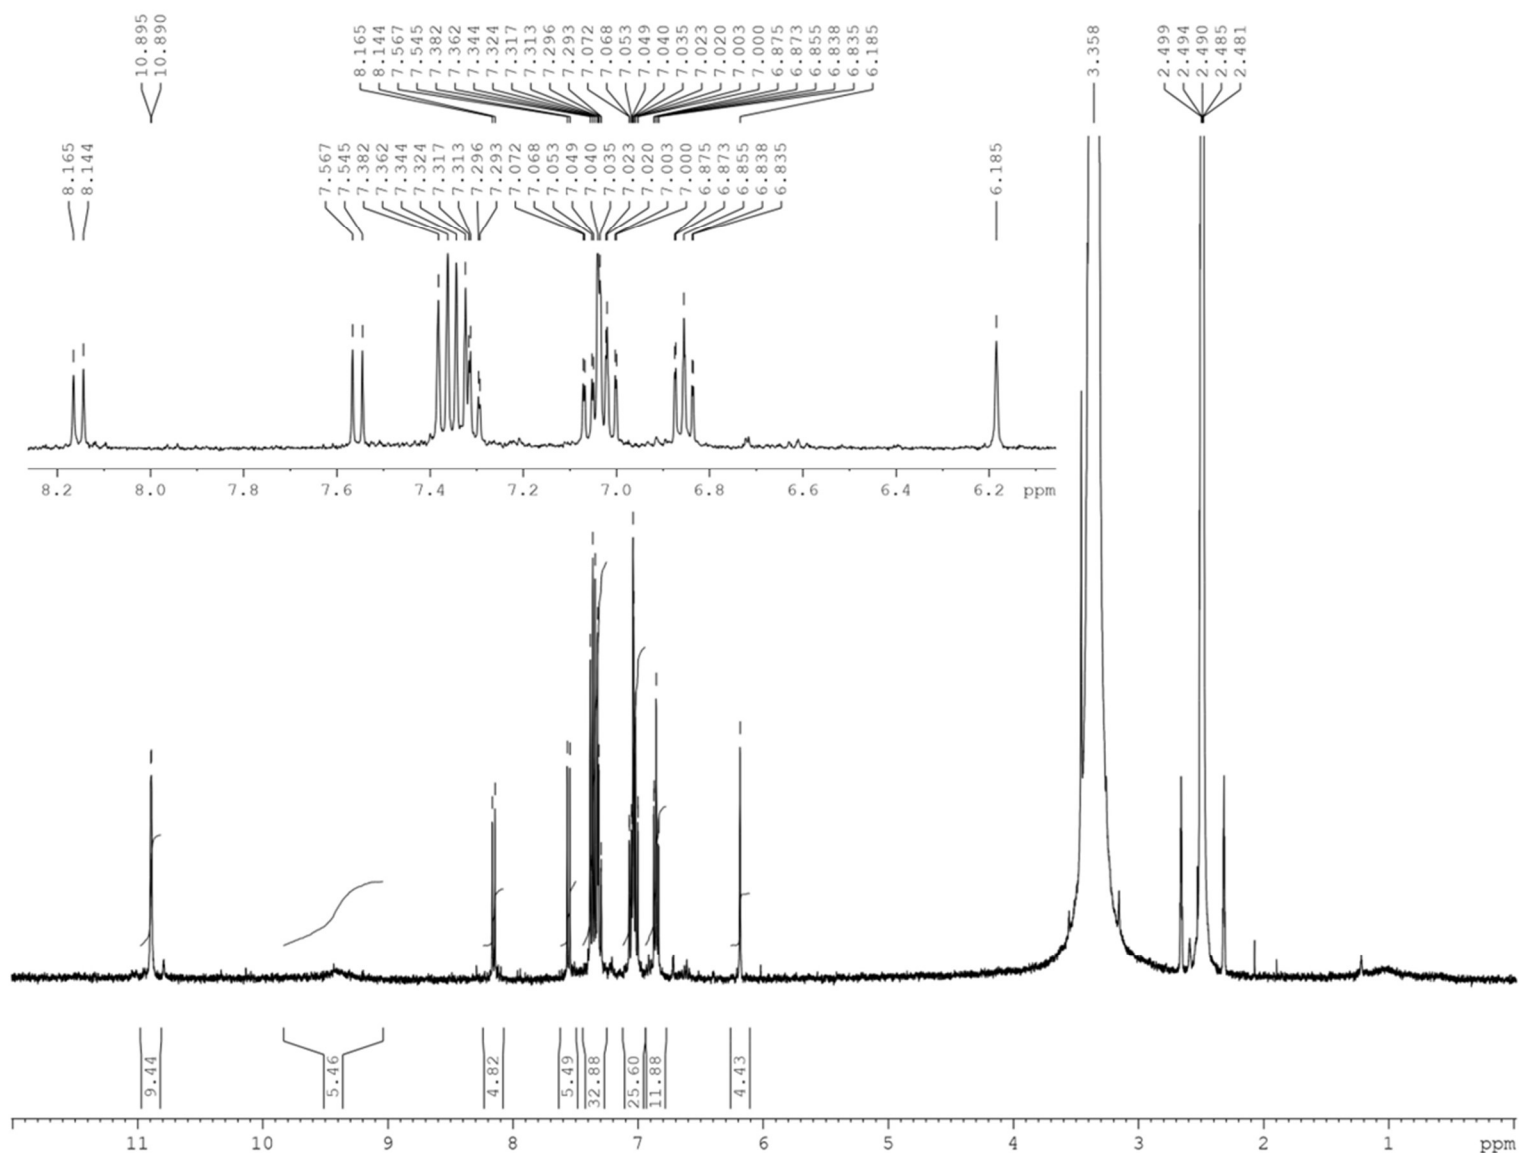

**Figure S5.**  $^1\text{H}$  NMR spectra of BIM **2c** in  $\text{DMSO-}d_6$ .

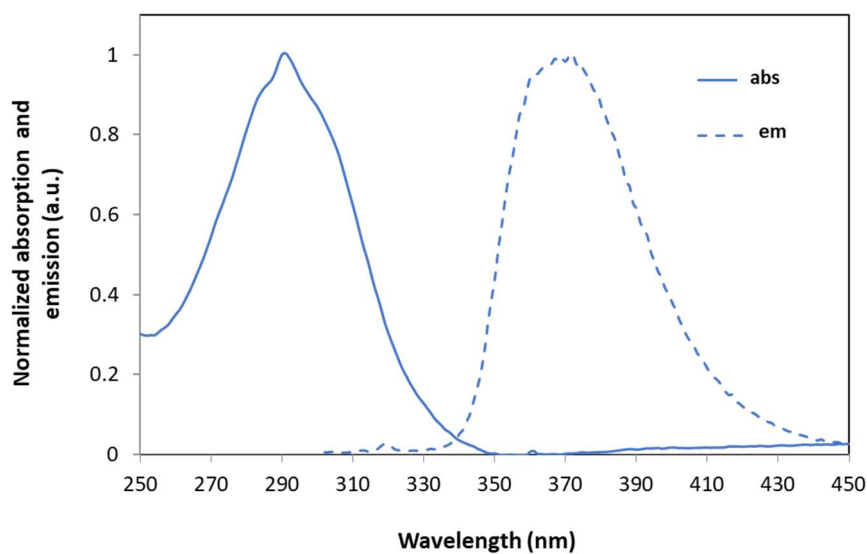

**Figure S6.** Normalized UV-visible absorption and emission spectra of BIM 2a in ACN solution.

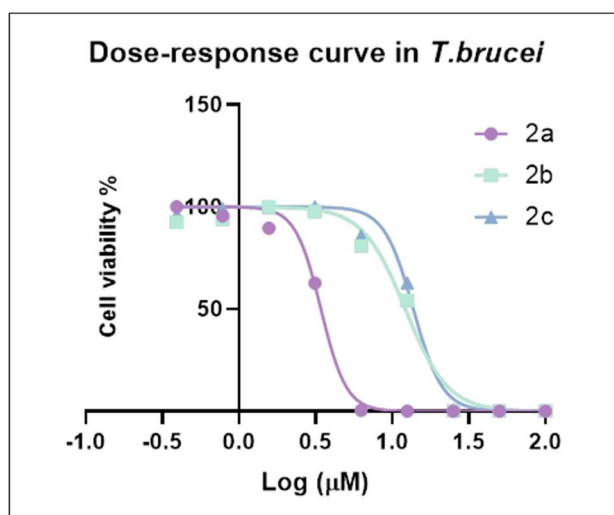

**Figure S7.** Dose-response curve of BIM 2a-c in *T. brucei* parasites.

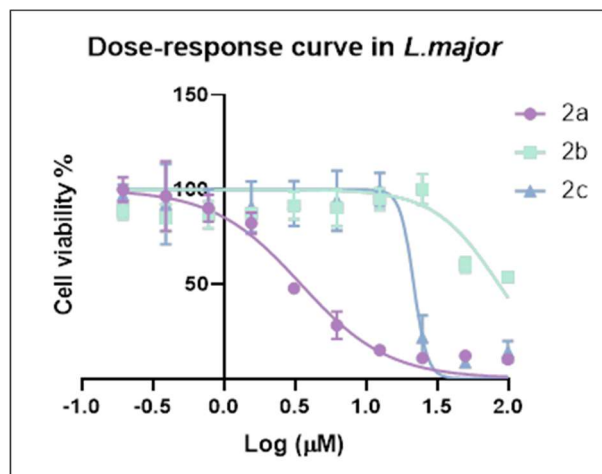

**Figure S8.** Dose-response curve of BIM **2a-c** in *L. major* parasites.

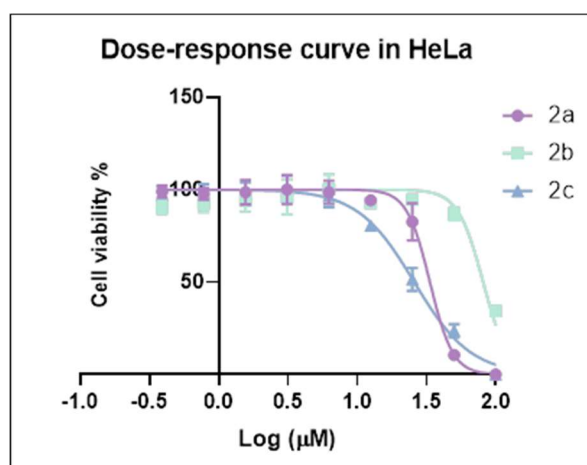

**Figure S9.** Dose-response curve of BIM **2a-c** in HeLa cells.



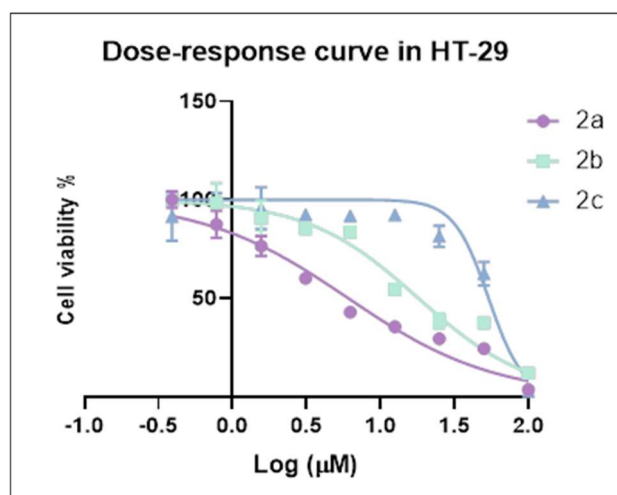

**Figure S10.** Dose-response curve of BIM 2a-c in HT-29 cells.

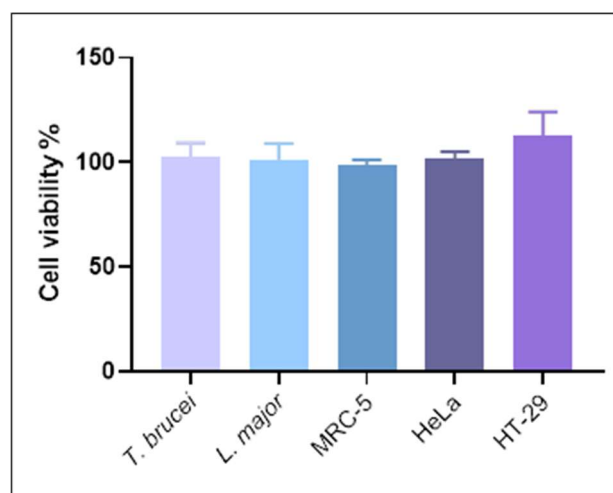

**Figure S11.** Cell viability of *T. brucei*, *L. major*, HeLa, and HT-29 cells treated with DMSO 1%.
